# Supplementary material for: CXCL10/CXCR3 signaling contributes to an inflammatory microenvironment and its blockade enhances progression of murine pancreatic precancerous lesions
Source: eLife. 2021 Jul 30;10:e60646. doi: 10.7554/eLife.60646 (PMC8360647; doi:10.7554/eLife.60646)
Supplement: Figure 1—figure supplement 1—source data 1. [file elife-60646-fig1-figsupp1-data1.xlsx]

## Sheet: Figure 1-figure supplement 1
Figure 1-figure supplement 1d
	Adeno-null-GFP			Adeno-cre-GFP
Cxcl10 Expression [2−ΔΔCt]	1.16672	0.96197	0.890987	0.908881	1.01259	1.09703
