# Supplementary material for: CXCL10/CXCR3 signaling contributes to an inflammatory microenvironment and its blockade enhances progression of murine pancreatic precancerous lesions
Source: eLife. 2021 Jul 30;10:e60646. doi: 10.7554/eLife.60646 (PMC8360647; doi:10.7554/eLife.60646)
Supplement: Figure 1—source data 1. [file elife-60646-fig1-data1.xlsx]

## Sheet: Figure 1
Figure 1b
	"normal " acini			ADM			PanIN
# of Cxcl10 Positive Pixels/Area [Fold Change]	0.00217644	0.00345187	0.00454734	1.06983	0.489188	1.44098	0.22812	0.119031	0.0625189
Average # of Cxcl10 Positive Pixels/Area [Fold Change]	0.00339188			1			0.136556
Figure 1c
	Control			IFNɣ
Cxcl10 Expression [2−ΔΔCt]	0.830449	1.10018	1.09452	70.611	58.6759	70.4273
Average Cxcl10 Expression [2−ΔΔCt]	1.00838			66.5714
Figure 1e
	Control		IFNɣ
CXCL10 in Supernatant [Fold Change]	0.927007	1.07299	5.09802	5.0146
Average CXCL10 in Supernatant [Fold Change]	1		5.05631
