# Supplementary material for: CXCL10/CXCR3 signaling contributes to an inflammatory microenvironment and its blockade enhances progression of murine pancreatic precancerous lesions
Source: eLife. 2021 Jul 30;10:e60646. doi: 10.7554/eLife.60646 (PMC8360647; doi:10.7554/eLife.60646)
Supplement: Figure 2—figure supplement 1—source data 1. [file elife-60646-fig2-figsupp1-data1.xlsx]

## Sheet: Figure 2-figure supplement 2
Figure 2-figure supplement 1a
	Non-Polarized BM-derived Macrophages
	Control				CXCL10
# of Migrated Macrophages [Fold Change]	1.09544	0.982785	1.01448	0.907297	1.15652	1.02399	1.13117	0.822877
Average # of Migrated Macrophages [Fold Change]	1				1.03364
	M1-Polarized BM-derived Macrophages
	Control			CXCL10
# of Migrated Macrophages [Fold Change]	0.988864	0.935412	1.07572	1.14254	1.4833	1.32962
Average # of Migrated Macrophages [Fold Change]	1			1.31849
	M2-Polarized BM-derived Macrophages
	Control				CXCL10
# of Migrated Macrophages [Fold Change]	1.07107	0.967752	0.988288	0.972886	0.721964	0.660356	1.00305	0.942724
Average # of Migrated Macrophages [Fold Change]	1				0.832023
Figure 2-figure supplement 1b
	F480+ CXCR3-					F480+ CXCR3+
% of Tissue Resident Macrophages	22.7642	12.6984	25.8065	15.3846	13.7931	77.2358	87.3016	74.1935	84.6154	86.2069
Average % of Tissue Resident Macrophages	18.0894					81.9106
Figure 2-figure supplement 1c	MTT [Fold change; relative to Day 0]
			Day 0	Day 1	Day 2
Vehicle	Sample 1		0.931034	1.86207	1.27586
	Sample 2		1.03448	1.34483	0.862069
	Sample 3		1.03448	1.75862	0.551724
	Average		1	1.65517	0.896552
CXCL10	Sample 1		2.48276	1.03448	0.758621
	Sample 2		0.931034	0.931034	0.655172
	Sample 3		1.13793	1.55172	1.06897
	Average		1.51724	1.17241	0.827586
