# Supplementary material for: CXCL10/CXCR3 signaling contributes to an inflammatory microenvironment and its blockade enhances progression of murine pancreatic precancerous lesions
Source: eLife. 2021 Jul 30;10:e60646. doi: 10.7554/eLife.60646 (PMC8360647; doi:10.7554/eLife.60646)
Supplement: Figure 2—source data 1. [file elife-60646-fig2-data1.xlsx]

## Sheet: Figure 2
Figure 2a
	non-polarized peritoneal macrophages			M1 polarized peritoneal macrophages			M2 polarized peritoneal macrophages
Cxcr3 Expression [2−ΔΔCt]	1.05204	0.974018	0.97589	0.279632	0.129891	0.324718	0.00773298	0.0043401	0.00568636
Average Cxcr3 Expression [2−ΔΔCt]	1.00065			0.244747			0.00591981
Figure 2b
	Non-Polarized Peritoneal Macrophages
	Control			CXCL10
# of Migrated Macrophages [Fold Change]	1.17391	0.834783	0.991304	1.5913	1.95652	1.39565
Average # of Migrated Macrophages [Fold Change]	1			1.64783
	M1-Polarized Peritoneal Macrophages
	Control			CXCL10
# of Migrated Macrophages [Fold Change]	0.98008	0.920319	1.0996	2.4741	2.29482	2.749
Average # of Migrated Macrophages [Fold Change]	1			2.50598
	M2-Polarized Peritoneal Macrophages
	Control				CXCL10
# of Migrated Macrophages [Fold Change]	1.11346	0.96654	0.987466	0.932534	1.04065	1.07161	1.12044	1.02627
Average # of Migrated Macrophages [Fold Change]	1				1.06474
Figure 2C
	CD3+ T Cells			F4/80+ Macrophages
Percentage CXCR3+ Cells	19.3	14.6	13.9	43	44.5	37.2
Average Percentage CXCR3+ Cells	15.9333			41.5667
Figure 2F
	% Cxcr3+ CD68+ iNOS+	% Cxcr3+ CD68- iNOS-
Patient 1	65	35
Patient 2	78.4	21.6
Patient 3	62.5	37.5
Patient 4	69.3333	30.6667
Patient 5	64	36
Patient 6	81.4815	18.5185
Patient 7	72.5	27.5
Patient 8	70.2703	29.7297
Patient 9	64.9123	35.0877
Patient 10	74.4681	25.5319
