# Supplementary material for: CXCL10/CXCR3 signaling contributes to an inflammatory microenvironment and its blockade enhances progression of murine pancreatic precancerous lesions
Source: eLife. 2021 Jul 30;10:e60646. doi: 10.7554/eLife.60646 (PMC8360647; doi:10.7554/eLife.60646)
Supplement: Figure 3—figure supplement 1—source data 1. [file elife-60646-fig3-figsupp1-data1.xlsx]

## Sheet: Figure 3-figure supplement 1
Figure 3-figure supplement 1b
			Il4ra Expression [2−ΔΔCt]	Stat6 Expression [2−ΔΔCt]
Isotype ctrl IgG	Sample 1		1.04933	1.03091
	Sample 2		1.01403	1.02547
	Sample 3		0.939804	0.945918
	Average		1.00105	1.00077
CXCR3 NAB	Sample 1		1.32976	1.56789
	Sample 2		1.33812	1.58023
	Sample 3		1.38387	1.55413
	Average		1.35058	1.56742
Figure 3-figure supplement 1d
			Irf4 Expression [2−ΔΔCt]	Irf5 Expression [2−ΔΔCt]
Isotype ctrl IgG	Sample 1		1.06282	1.03652
	Sample 2		0.987321	0.976105
	Sample 3		0.95298	0.98838
	Average		1.00104	1.00034
CXCR3 NAB	Sample 1		3.21158	0.494583
	Sample 2		3.26767	0.508668
	Sample 3		2.91347	0.506941
	Average		3.13091	0.503397
Figure 3-figure supplement 1f	F4/80+ Cells
				Positive pixels per Area [Fold Change]		Average [Fold Change]
p48Cre;LSL-KrasG12D	Isotype ctrl IgG	Mouse 1		1.16627		1
		Mouse 2		1.10835
		Mouse 3		0.725387
	CXCR3 NAB	Mouse 1		1.28297		1.47112
		Mouse 2		1.41518
		Mouse 3		1.71522
