# Supplementary material for: CXCL10/CXCR3 signaling contributes to an inflammatory microenvironment and its blockade enhances progression of murine pancreatic precancerous lesions
Source: eLife. 2021 Jul 30;10:e60646. doi: 10.7554/eLife.60646 (PMC8360647; doi:10.7554/eLife.60646)
Supplement: Figure 3—source data 1. [file elife-60646-fig3-data1.xlsx]

## Sheet: Figure 3
Figure 3b	M1-polarized Peritoneal Macrophages
	isotype control IgG			CXCR3 NAB
Cd38 Expression [2−ΔΔCt]	1.04135	0.931611	1.03079	0.256896	0.467569	0.258984
Ym1/Chil3 Expression [2−ΔΔCt]	1.14177	0.974702	0.898568	309.007	311.329	308.243
Arg1 Expression [2−ΔΔCt]	1.01455	1.00577	0.979999	2.13468	2.0969	2.02495
Fizz1/Retnla Expression [2−ΔΔCt]	0.466058	1.7482	1.22735	696.06	732.798	709.188
Figure 3d	pY701-STAT1+ Macrophages [Fold Change ]
				Field 1	Field 2	Field 3	Average of 3 fields	Average of 3 mice
p48Cre;LSL-KrasG12D	Isotype Control	Mouse 1		0.49941	0.596815	0.479134	0.52512	0.495556
		Mouse 2		0.523334	0.63384	0.483169	0.546781
		Mouse 3		0.420724	0.470603	0.352972	0.414766
	CXCR3 NAB	Mouse 1		1.17466	0.936921	1.02911	1.0469	1
		Mouse 2		0.935577	1.00157	0.964184	0.96711
		Mouse 3		1.04441	0.936921	0.976639	0.98599
