# Supplementary material for: CXCL10/CXCR3 signaling contributes to an inflammatory microenvironment and its blockade enhances progression of murine pancreatic precancerous lesions
Source: eLife. 2021 Jul 30;10:e60646. doi: 10.7554/eLife.60646 (PMC8360647; doi:10.7554/eLife.60646)
Supplement: Figure 4—figure supplement 1—source data 1. [file elife-60646-fig4-figsupp1-data1.xlsx]

## Sheet: Figure 4-figure supplement 1
Figure 4-figure supplement 1c	Ym1+ Cells
				Cells per Abnormal Area [Fold Change]		Average [Fold Change]
p48Cre;LSL-KrasG12D	isotype ctrl IgG	Mouse 1		0.584862		1
		Mouse 2		1.05275
		Mouse 3		1.36239
	CXCL10 NAB	Mouse 1		1.90596		2.41743
		Mouse 2		3.26147
		Mouse 3		2.08486
Figure 4-figure supplement 1e	SMA Content
				Positive pixels per Area [Fold Change]		Average [Fold Change]
p48Cre;LSL-KrasG12D	isotype ctrl IgG	Mouse 1		1.17469		1
		Mouse 2		0.615156
		Mouse 3		1.21015
	CXCL10 NAB	Mouse 1		1.4746		1.64421
		Mouse 2		1.66059
		Mouse 3		1.79744
