# Supplementary material for: CXCL10/CXCR3 signaling contributes to an inflammatory microenvironment and its blockade enhances progression of murine pancreatic precancerous lesions
Source: eLife. 2021 Jul 30;10:e60646. doi: 10.7554/eLife.60646 (PMC8360647; doi:10.7554/eLife.60646)
Supplement: Figure 4—figure supplement 2—source data 1. [file elife-60646-fig4-figsupp2-data1.xlsx]

## Sheet: Figure 4-figure supplement2
Figure 4-figure supplement 2a	CD3+ Cells
				Positive pixels per abnormal area [Fold change]		Average positive pixels per abnormal area [Fold change]
p48Cre;LSL-KrasG12D	Isotype Control IgG	Mouse 1		0.919581		1
		Mouse 2		1.15432
		Mouse 3		0.926104
	CXCR3 NAB	Mouse 1		0.598347		0.710773
		Mouse 2		0.757795
		Mouse 3		0.776176
Figure 4-figure supplement 2b	NKG2D+;CD3- Cells
				NKG2D+;CD3- cells per area [Fold change]		Average NKG2D+;CD3- cells per area [Fold change]
p48Cre;LSL-KrasG12D	Isotype Control IgG	Mouse 1		1.09997		1
		Mouse 2		0.565838
		Mouse 3		1.33419
	CXCR3 NAB	Mouse 1		0.177686		0.668158
		Mouse 2		1.3721
		Mouse 3		0.454685
Figure 4-figure supplement 2c	Pancreatic IFNɣ Expression
				IFNɣ per area [Fold change]		Average IFNɣ per area [Fold change]
p48Cre;LSL-KrasG12D	Isotype Control IgG	Mouse 1		1.59968		1
		Mouse 2		0.591009
		Mouse 3		0.809316
	CXCR3 NAB	Mouse 1		0.925179		1.16584
		Mouse 2		1.30358
		Mouse 3		1.26875
Figure 4-figure supplement 2d	CD3+ Cells
				# of cells per field [Fold change]		Average # of cells per field [Fold change]
p48Cre;LSL-KrasG12D	Isotype Control IgG	Mouse 1		0.785425		1
		Mouse 2		1.38057
		Mouse 3		0.834008
	CXCL10 NAB	Mouse 1		0.94197		0.906433
		Mouse 2		0.773279
		Mouse 3		1.00405
Figure 4-figure supplement 2e	CD3+ CD8+ Cells
				% of CD3+ cells that are CD8+ per field [Fold change]		Average % of CD3+ cells that are CD8+ per field [Fold change]
p48Cre;LSL-KrasG12D	Isotype Control IgG	Mouse 1		0.719138		1
		Mouse 2		1.57974
		Mouse 3		0.701119
	CXCL10 NAB	Mouse 1		0.733097		0.927718
		Mouse 2		1.17503
		Mouse 3		0.875023
	CD3+ CD4+ Cells
				% of CD3+ cells that are CD4+ per field [Fold change]		Average % of CD3+ cells that are CD4+ per field [Fold change]
p48Cre;LSL-KrasG12D	Isotype Control IgG	Mouse 1		0.891526		1
		Mouse 2		1.05257
		Mouse 3		1.0559
	CXCL10 NAB	Mouse 1		0.938861		0.92313
		Mouse 2		0.791309
		Mouse 3		1.03922
