# Supplementary material for: CXCL10/CXCR3 signaling contributes to an inflammatory microenvironment and its blockade enhances progression of murine pancreatic precancerous lesions
Source: eLife. 2021 Jul 30;10:e60646. doi: 10.7554/eLife.60646 (PMC8360647; doi:10.7554/eLife.60646)
Supplement: Figure 4—figure supplement 3—source data 1. [file elife-60646-fig4-figsupp3-data1.xlsx]

## Sheet: Figure 4-figure supplement 3
Figure 4-figure supplement 3b	CD3+ Cells
				# of cells per area [% Change]		Average # of cells per area [% change]
p48Cre;LSL-KrasG12D	Isotype Control IgG	Sample 1		95.7627		100
		Sample 2		108.475
		Sample 3		95.7627
	T cell depleting IgG	Sample 1		50.8475		47.46
		Sample 2		54.2373
		Sample 3		37.2881
Figure 4-figure supplement 3c	Abnormal Area
					Abnormal area [Fold change]		Average Abnormal area [Fold change]
p48Cre;LSL-KrasG12D	T cell depletion	Isotype Control IgG	Mouse 1		0.855181		1
			Mouse 2		1.02723
			Mouse 3		1.11759
		CXCR3 NAB	Mouse 1		1.67971		1.46572
			Mouse 2		1.2521
			Mouse 3		1.46535
	Ctrl	CXCR3 NAB	Mouse 1		1.45161		1.31457
			Mouse 2		1.25485
			Mouse 3		1.23726
Figure 4-figure supplement 3d	M1 Macrophages
					# Cells per Field [Avg. of 3 fields; Fold change]		Average # Cells per Field [Fold change]
p48Cre;LSL-KrasG12D	T cell depletion	Isotype Control IgG	Mouse 1		0.587253		1
			Mouse 2		1.3475
			Mouse 3		1.06525
		CXCR3 NAB	Mouse 1		0.359636		0.30956
			Mouse 2		0.259484
			Mouse 3		0.400607
	Ctrl	CXCR3 NAB	Mouse 1		0.446131		0.371775
			Mouse 2		0.273141
			Mouse 3		0.396055
Figure 4-figure supplement 3e	Ym1+ Macrophages
					# Cells per Field [Avg. of 3 fields; Fold change]		Average # Cells per Field [Fold change]
p48Cre;LSL-KrasG12D	T cell depletion	Isotype Control IgG	Mouse 1		1.54849		1
			Mouse 2		0.678879
			Mouse 3		0.772629
		CXCR3 NAB	Mouse 1		2.07543		2.29741
			Mouse 2		1.82004
			Mouse 3		2.99677
	Ctrl	CXCR3 NAB	Mouse 1		1.90733		2.13254
			Mouse 2		2.65409
			Mouse 3		1.83621
Figure 4-figure supplement 3f	Pancreatic IFNɣ/Ifng Expression
				Positive pixels per area [Fold change]		Average positive pixels per area [Fold change]
p48Cre;LSL-KrasG12D	Isotype Control IgG	Mouse 1		0.779037		1
		Mouse 2		1.64429
		Mouse 3		0.576668
	T cell depletion	Mouse 1		0.258546		0.575718
		Mouse 2		0.489551
		Mouse 3		0.979056
Figure 4-figure supplement 3h	CXCL10 in supernatant
			Concentration in supernatant [Fold change]		Average concentration in supernatant [Fold change]
SM3-control	Sample 1		1.05155		1
	Sample 2		0.958763
	Sample 3		0.989691
SM3-CXCL10	Sample 1		1.8866		2.05155
	Sample 2		2.25773
	Sample 3		2.01031
