# Supplementary material for: CXCL10/CXCR3 signaling contributes to an inflammatory microenvironment and its blockade enhances progression of murine pancreatic precancerous lesions
Source: eLife. 2021 Jul 30;10:e60646. doi: 10.7554/eLife.60646 (PMC8360647; doi:10.7554/eLife.60646)
Supplement: Figure 4—source data 1. [file elife-60646-fig4-data1.xlsx]

## Sheet: Figure 4
Figure 4b	YM1+ Macrophages [Fold Change]
				Field 1	Field 2	Field 3	Average of 3 fields	Average of 3 mice
p48Cre;LSL-KrasG12D	Isotype Control	Mouse 1		1.12979	0.995745	0.191489	0.77234	1
		Mouse 2		2.16383	0.459574	1.95319	1.52553
		Mouse 3		0.555319	0.957447	0.593617	0.702128
	CXCR3 NAB	Mouse 1		3.73404	2.87234	4.48085	3.69574	2.80851
		Mouse 2		2.58511	2.33617	1.97234	2.29787
		Mouse 3		2.47021	2.83404	1.99149	2.43191
Figure 4d	SMA Content
				Positive pixels per area [Fold Change]		Average [Fold Change]
p48Cre;LSL-KrasG12D	Isotype Control	Mouse 1		1.15875		1
		Mouse 2		0.928934
		Mouse 3		0.912318
	CXCR3 NAB	Mouse 1		1.80146		1.5465
		Mouse 2		1.24807
		Mouse 3		1.58998
Figure 4f	Abnormal Area
				Abnormal Area [Fold Change]		Average Abnormal Area [Fold Change]
p48Cre;LSL-KrasG12D	Isotype Control	Mouse 1		0.644879		1
		Mouse 2		1.38389
		Mouse 3		1.05631
		Mouse 4		0.91492
	CXCR3 NAB	Mouse 1		1.3349		1.70533
		Mouse 2		1.36434
		Mouse 3		1.90862
		Mouse 4		2.21345
Figure 4g	Types of Lesions
				% ADM	Average % ADM	% PanIN-1	Average % PanIN-1	% PanIN-2	Average % PanIN-2	% PanIN-3	Average % PanIN-3
p48Cre;LSL-KrasG12D	Isotype Control	Mouse 1		81.8345	80.3679	18.1655	19.6321	0	0	0	0
		Mouse 2		80.455		19.545		0		0
		Mouse 3		88.75		11.25		0		0
		Mouse 4		70.4319		29.5681		0		0
	CXCR3 NAB	Mouse 1		80.0799	75.225	19.9201	24.6645	0	0.0580462	0	0.0525101
		Mouse 2		63.2809		36.4641		0.169996		0.0849979
		Mouse 3		77.8127		22.1245		0		0.0628536
		Mouse 4		79.7264		20.1493		0.0621891		0.0621891
