# Supplementary material for: CXCL10/CXCR3 signaling contributes to an inflammatory microenvironment and its blockade enhances progression of murine pancreatic precancerous lesions
Source: eLife. 2021 Jul 30;10:e60646. doi: 10.7554/eLife.60646 (PMC8360647; doi:10.7554/eLife.60646)
Supplement: Figure 5—source data 1. [file elife-60646-fig5-data1.xlsx]

## Sheet: Figure 5
Figure 5b	Abnormal Area
				% Abnormal Area [Arc Sin Transformed]		Average % Abnormal Area [Arc Sin Transformed]
Athymic Nu/Nu Mice	SM3-control	Mouse 1		51.0545		53.0686
		Mouse 2		60.1919
		Mouse 3		47.9596
	SM3-CXCL10	Mouse 1		37.9574		32.3659
		Mouse 2		29.7732
		Mouse 3		29.3671
Figure 5c	SMA Content
				Positive pixels per Area [Fold Change]		Average Fold Change
Athymic Nu/Nu Mice	SM3-control	Mouse 1		1.15288		1
		Mouse 2		0.726727
		Mouse 3		1.12039
	SM3-CXCL10	Mouse 1		0.618977		0.54
		Mouse 2		0.463447
		Mouse 3		0.524055
Figure 5d	F4/80+ Cells
				Positive pixels per Area [Fold Change]		Average [Fold Change]
Athymic Nu/Nu Mice	SM3-control	Mouse 1		1.65005		1
		Mouse 2		0.330376
		Mouse 3		1.01958
	SM3-CXCL10	Mouse 1		5.13682		4.10095
		Mouse 2		3.87402
		Mouse 3		3.29201
Figure 5e	M1 Macrophages [Fold Change]
				Field 1	Field 2	Field 3	Average of 3 fields	Average of 3 mice
Athymic Nu/Nu Mice	SM3-control	Mouse 1		0.77451	1.18627	1.34314	1.10131	1
		Mouse 2		0.441176	0.931373	0.509804	0.627451
		Mouse 3		1.2549	1.29412	1.26471	1.27124
	SM3-CXCL10	Mouse 1		2.4902	2.61765	2.36275	2.4902	2.09041
		Mouse 2		1.62745	1.95098	2.53922	2.03922
		Mouse 3		1.96078	1.59804	1.66667	1.74183
	M2 Macrophages [Fold Change]
				Positive pixels per Area [Fold Change]		Average [Fold Change]
Athymic Nu/Nu Mice	SM3-control	Mouse 1		1.03387		1
		Mouse 2		1.05324
		Mouse 3		0.912886
	SM3-CXCL10	Mouse 1		0.654039		0.689779
		Mouse 2		0.843704
		Mouse 3		0.571593
